# Supplementary material for: Pleistocene climate change promoted rapid diversification of aquatic invertebrates in Southeast Australia
Source: PubMed Central journal article supplement (PMC3503846; doi:10.1186/1471-2148-12-142), 2012-08-09
Supplement: 1471-2148-12-142-S1.pdf [file 1471-2148-12-142-S1.pdf]

Table S1: Sequences of primers used for PCR and sequencing.

Forward (F) and reverse (R) primers are given. Mitochondrial gene loci: CO1 = cytochrome C oxidase 1, CytB = cytochrome B oxidase, 16S = 16S ribosomal RNA. Nuclear gene loci: H3 = histon 3, H4 = histon 4, ARK = arginine kinase, 18S = 18S ribosomal RNA. I = inosine.

| Gene | Primer   | F/R | Primer sequence                                                     | Reference              |
|------|----------|-----|---------------------------------------------------------------------|------------------------|
| CO1  | Jerry    | F   | CAA CAT TTA TTT TGA TTT TTT GG                                      | Simon et al. 1994      |
|      | Pat      | R   | TCC AAT GCA CTA ATC TGC CAT ATT A                                   |                        |
| CytB | CB3      | F   | GAG GAG CAA CTG TAA TTA CTA A                                       | Baraclough et al. 1999 |
|      | CB4      | R   | AAA AGA AA(AG) TAT CAT TCA GGT TGA AT                               |                        |
| 16S  | M14      | F   | CGC CTG TTT AAC AAA AAC AT                                          | Simon et al. 1994      |
|      | M223     | R   | GGT CCC TTA CGA ATT TGA ATA TAT CCT                                 |                        |
| H3   | H3aF     | F   | ATG GCT CGT ACC AAG CAG AC(AG) CGC                                  | Colgan et al. 1998     |
|      | H3aR     | R   | ATA TCC TT(AG) GGC AT(AG) AT(AG) GTG AC                             |                        |
| H4   | H4F2s    | F   | T(CG)C GIG A(CT)A ACA T(CT)C AGG GIA TCA C                          | Pineau et al. 2004     |
|      | H4F2er   | R   | C(GT)(CT) TTI AGI GC(AG) TAI ACC AC(AG) TCC AT                      |                        |
| ARK  | AK183F   | F   | GAT TCT GGA GTC GG(AGCT) AT(CT) TA(CT)<br>GC(AGCT) CC(CT) GA(CT) GC | Wild & Maddison 2008   |
|      | AK939R   | R   | GCC (AGCT)CC (CT)TC (AG)GC (CT)TC (AG)GT GTG<br>(CT)TC              |                        |
| 18S  | 18S 5'   | F   | GAC AAC CTG GTT GAT CCT GCC AGT (I)                                 | Shull et al. 2001      |
|      | 18S b5.0 | R   | TAA CCG CAA CAA CTT TAA T (I)                                       |                        |

- Baraclough, T.G., Hogan, J.E., & Vogler, A.P. 1999 Testing whether ecological factors promote cladogenesis in a group of tiger beetles (Coleoptera: Cicindelidae). *Proc. R. Soc. Lond. B.* 266, 1061-1067.
- Colgan, D.J., McLauchlan, A., Wilson, G.D.F., Livingston, S.P., Edgecombe, G.D., Cassis, G. & Gray, M.R. 1998 Histone H3 and U2 snRNA DNA sequences and arthropod molecular evolution. *Aust. J. Zool.* 46, 419-437.
- Pineau, P., Henry, M., Suspène, R., Marchio, A., Dettai, A., Debruyne, R., Petit, T., Lécu, A., Moisson, P., Dejean, A., et al. 2004 A Universal Primer Set for PCR Amplification of Nuclear Histone H4 Genes from All Animal Species. *Mol. Biol. Evol.* 22, 582-588.
- Shull, V.L., Vogler, A.P., Baker, M.D., Maddison, D.R. & Hammond, P.M. 2001 Sequence Alignment of 18S Ribosomal RNA and the Basal Relationships of Aedeopachyinae Beetles: Evidence for Monophyly of Aquatic Families and the Placement of Trachypachidae. *Syst. Biol.* 50, 945-969.
- Simon, C., Frati, F., Beckenbach, A.T., Crespi, B., Liu, H. & Flook, P. 1994 Evolution, weighting, and phylogenetic utility of mitochondrial gene sequences and a compilation of conserved polymerase chain reaction primers. *Ann. Entomol Soc. Am.* 87, 651-701.
- Wild, A.L. & Maddison, D.R. 2008 Evaluating nuclear protein-coding genes for phylogenetic utility in beetles. *Mol. Phylogenet. Evol.* 48, 877-891.
