# Supplementary material for: Pleistocene climate change promoted rapid diversification of aquatic invertebrates in Southeast Australia
Source: PubMed Central journal article supplement (PMC3503846; doi:10.1186/1471-2148-12-142), 2012-08-09
Supplement: 1471-2148-12-142-S3.pdf [file 1471-2148-12-142-S3.pdf]

Table S3: Ecological data on all *Sternopriscus* species.

Data from Hendrich & Watts [28,29].

| <b>Species</b>           | <b>Altitude</b> | <b>Habitat</b>         |
|--------------------------|-----------------|------------------------|
| <i>S. alpinus</i>        | Above 1000 m    | Acidophilic            |
| <i>S. alligatorensis</i> | 50 - 100 m      | Rheophilic             |
| <i>S. aquilonaris</i>    | 50 - 100 m      | Rheophilic             |
| <i>S. balkei</i>         | 50 - 100 m      | Rheophilic             |
| <i>S. barbarae</i>       | 50 - 300 m      | Rheophilic             |
| <i>S. browni</i>         | 0 - 400 m       | Eurytopic              |
| <i>S. clavatus</i>       | 20 - 700 m      | Eurytopic              |
| <i>S. eikei</i>          | 20 m            | Acidophilic            |
| <i>S. emmae</i>          | 50 - 100 m      | Rheophilic             |
| <i>S. goldbergi</i>      | 50 - 100 m      | Rheophilic             |
| <i>S. hansardii</i>      | 200 - 500 m     | Rheophilic             |
| <i>S. meadfootii</i>     | 200 - 1000 m    | Eurytopic              |
| <i>S. marginatus</i>     | 50 - 400 m      | Rheophilic             |
| <i>S. minimus</i>        | 0 - 100 m       | Acidophilic            |
| <i>S. mouchampsi</i>     | 0 - 100 m       | Acidophilic            |
| <i>S. montanus</i>       | Above 1000 m    | Acidophilic/rheophilic |
| <i>S. multimaculatus</i> | 0 - 100 m       | Eurytopic              |
| <i>S. mundanus</i>       | 200 - 1550 m    | Acidophilic            |
| <i>S. pilbaraensis</i>   | 50 - 500 m      | Rheophilic             |
| <i>S. storeyi</i>        | 0 - 50 m        | Acidophilic            |
| <i>S. tarsalis</i>       | 0 - 500 m       | Eurytopic              |
| <i>S. tasmanicus</i>     | 0 - 500 m       | Eurytopic              |
| <i>S. wallumphilia</i>   | 0 - 200 m       | Acidophilic            |
| <i>S. wattsi</i>         | 0 - 100 m       | Eurytopic              |
| <i>S. weckwerthi</i>     | 200 - 1000 m    | Acidophilic            |
| <i>S. wehnckeii</i>      | 0 - 500 m       | Eurytopic              |
| <i>S. weiri</i>          | 0 - 50 m        | Acidophilic            |
| <i>S. williamsi</i>      | Above 1000 m    | Acidophilic            |
